# Supplementary material for: Antimicrobial Nanoformulations Based on Schinus areira Essential Oil
Source: MDPI journal article supplement (doi:10.3390/ddc2020026), 2023-06-12
Supplement: s1 [file s1]

# Antimicrobial Nanoformulations Based on *Schinus areira* Essential Oil

Andrea C. Cutro, Anike Ferreyra Maillard, Pablo R. Dalmaso, Sergio A. Rodriguez and Axel Hollmann\*

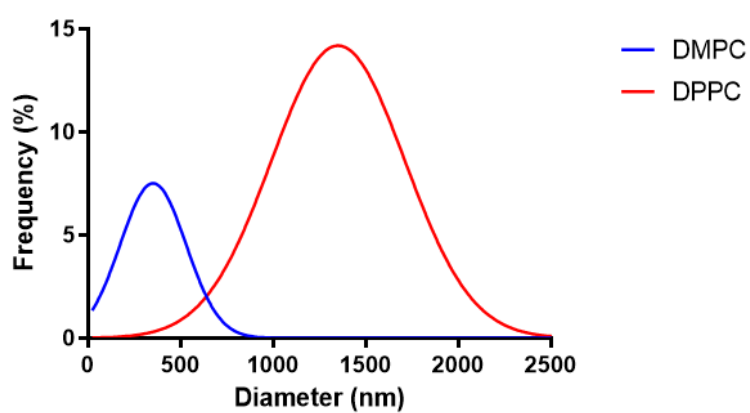

**Figure S1.** Size distribution of MLV of DPPC or DMPC.
